# Supplementary material for: Electronic modulation and surface reconstruction of cactus-like CoB2O4@FeOOH heterojunctions for synergistically triggering oxygen evolution reactions
Source: Royal Society of Chemistry journal article supplement (doi:10.1039/d2ta01929a), 2022-01-01
Supplement: d2ta01929a1.pdf [file d2ta01929a1.pdf]

## **Electronic Modulation and Surface Reconstruction of Cactus-Like $\text{CoB}_2\text{O}_4@FeOOH$ Heterojunction for Synergistically Triggering Oxygen Evolution Reaction**

Xueli Yin, Run Cai, Xiaoping Dai\*, Fei Nie, Yonghao Gan, Ying Ye, Ziteng Ren, Yujie Liu, Baoqiang Wu, Yihua Cao, Xin Zhang

State Key Laboratory of Heavy Oil Processing, College of Chemical Engineering and Environment,  
China University of Petroleum, Beijing, 102249, China.

\* Corresponding author.

Prof X. P. Dai: State Key Laboratory of Heavy Oil Processing

College of Chemical Engineering and Environment,

China University of Petroleum, Beijing 102249, PR China

E-mail address: daixp@cup.edu.cn

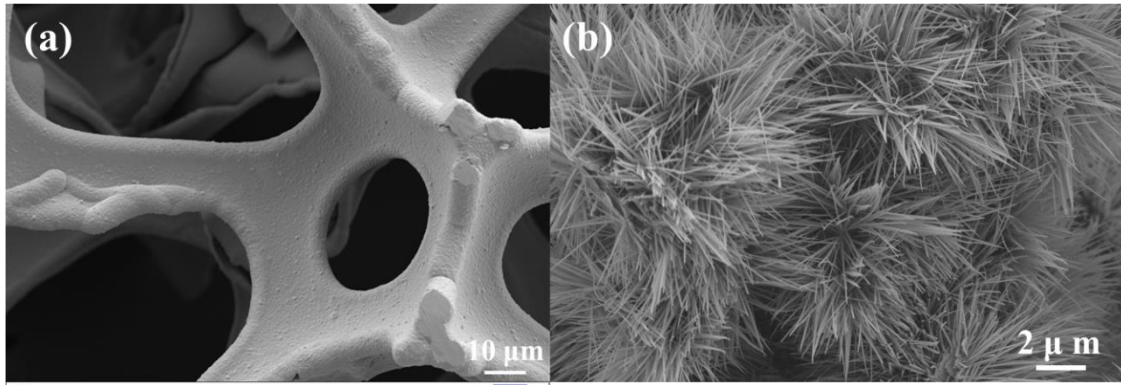

**Figure S1** SEM images of (a) NF and (b) Co(OH)F/NF.

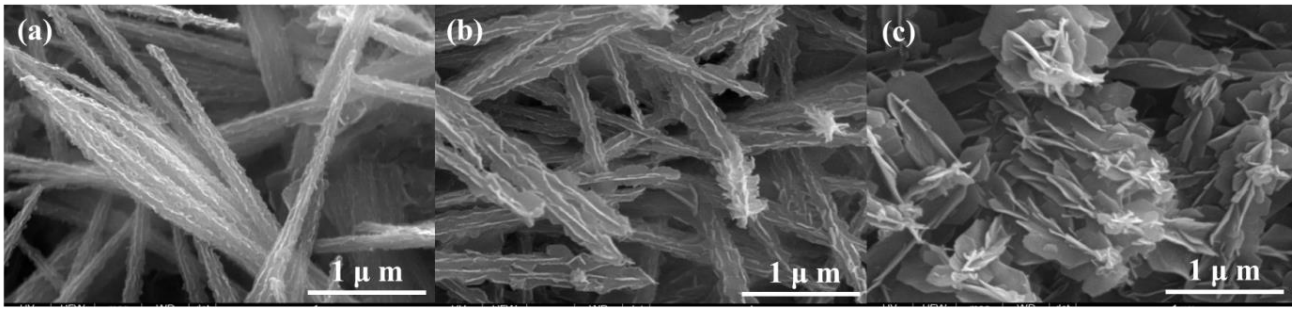

**Figure S2** SEM images of the CoB<sub>2</sub>O<sub>4</sub>@FeOOH/NF with various electro-synthesis time ((a) 60 s, (b) 180 s and (c) 300 s).

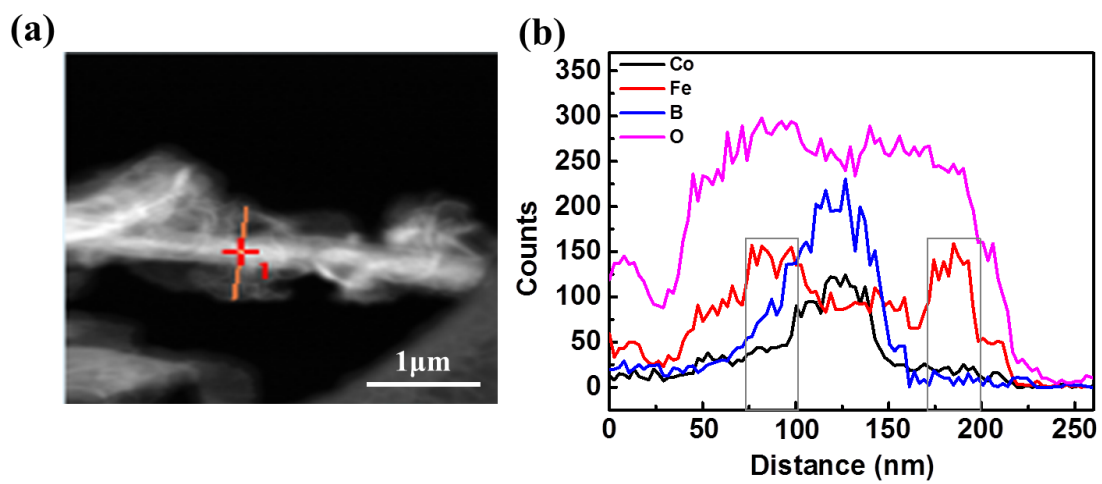

Figure S3 (a) and (b) elemental line scanning images of  $\text{CoB}_2\text{O}_4@\text{FeOOH}/\text{NF}$ .

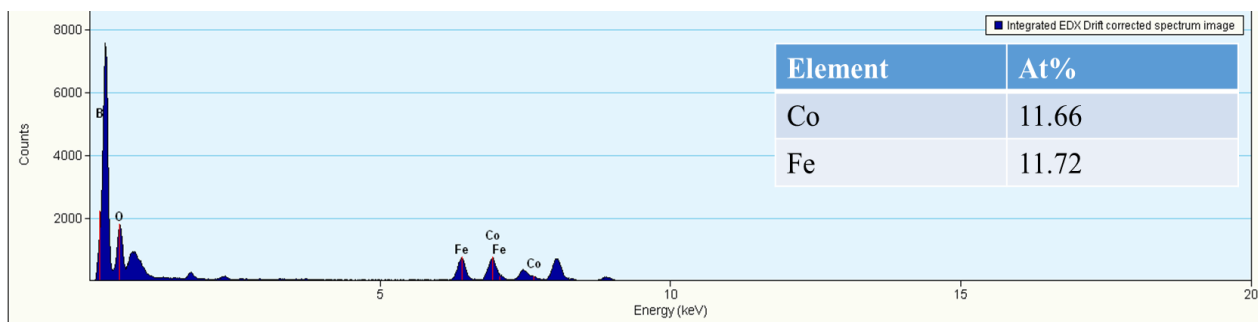

**Figure S4** TEM-EDS spectrum of CoB<sub>2</sub>O<sub>4</sub>@FeOOH/NF.

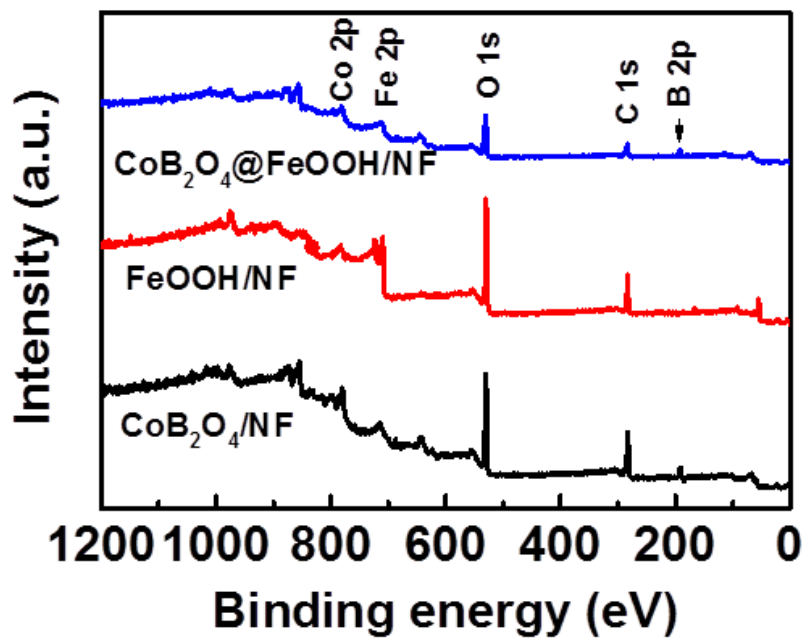

**Figure S5** The survey XPS spectra of CoB<sub>2</sub>O<sub>4</sub> /NF, FeOOH/NF and CoB<sub>2</sub>O<sub>4</sub>@FeOOH/NF.

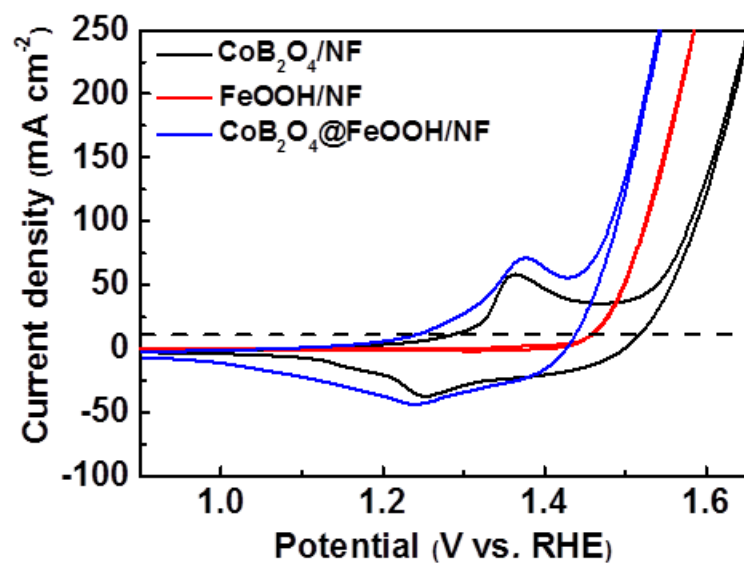

**Figure S6** CV curves of CoB<sub>2</sub>O<sub>4</sub> /NF, FeOOH/NF and CoB<sub>2</sub>O<sub>4</sub>@FeOOH/NF.

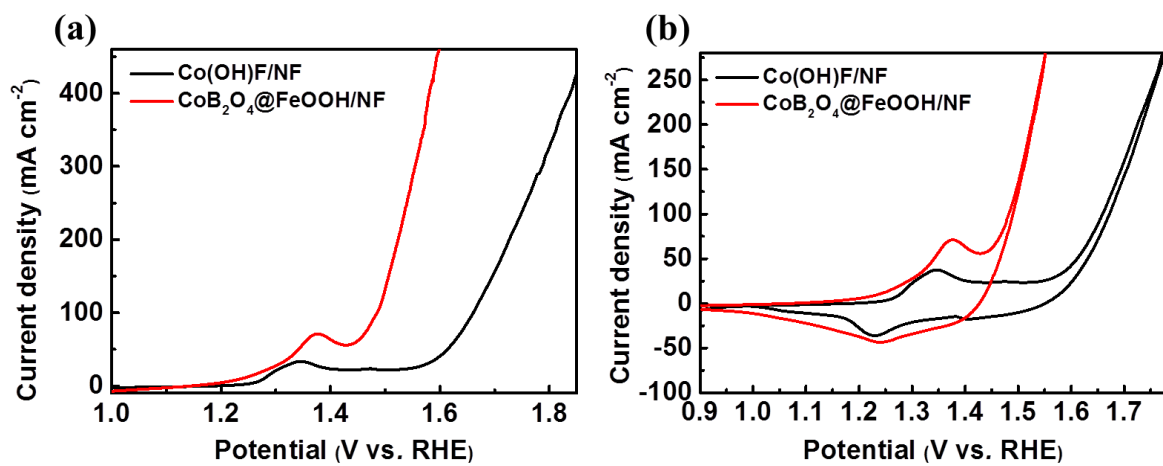

**Figure S7** (a) LSV curves and (b) CV curves of Co(OH)F/NF and CoB<sub>2</sub>O<sub>4</sub>@FeOOH/NF.



**Table S1** Comparison of OER activities for reported catalysts

| Catalysts                                     | Substrate      | $\eta_{10}$<br>(mV) | $\eta_{100}$<br>(mV) | Stability    | Ref              |
|-----------------------------------------------|----------------|---------------------|----------------------|--------------|------------------|
| <b>CoB<sub>2</sub>O<sub>4</sub>@FeOOH/NF</b>  | <b>Ni Foam</b> | <b>205</b>          | <b>260</b>           | <b>100 h</b> | <b>This work</b> |
| FeOOH/Cr-NiCo <sub>2</sub> O <sub>4</sub> /NF | Ni Foam        | 217                 | 268                  | 20 h         | [1]              |
| FeOOH(Se)/IF                                  | Iron foam      | 287                 | 364                  | 15 h         | [2]              |
| CoP/FeOOH                                     | -              | 290                 | -                    | 20 h         | [3]              |
| NiV-LDH@FeOOH/NF                              | Ni Foam        | -                   | 297                  | 20 h         | [4]              |
| Co@Co-Bi/Ti                                   | Ti mesh        | 329                 | 373                  | 20000s       | [5]              |
| Co-Fe-Bi/NF                                   | Ni Foam        | 307                 | -                    | 40 h         | [6]              |
| CC@CoO@FeOOH-NWAs                             | Carbon Cloth   | 255                 | -                    | 20 h         | [7]              |
| Co-B@Co-Bi                                    | -              | 291                 | -                    | 25 h         | [8]              |
| FeOOH@NiCo <sub>2</sub> O <sub>4</sub>        | -              | 203                 | 259                  | 10 h         | [9]              |
| FeOOH/Co/FeOOHHNTAs-NF                        | Ni Foam        | 239                 | 305                  | 50 h         | [10]             |

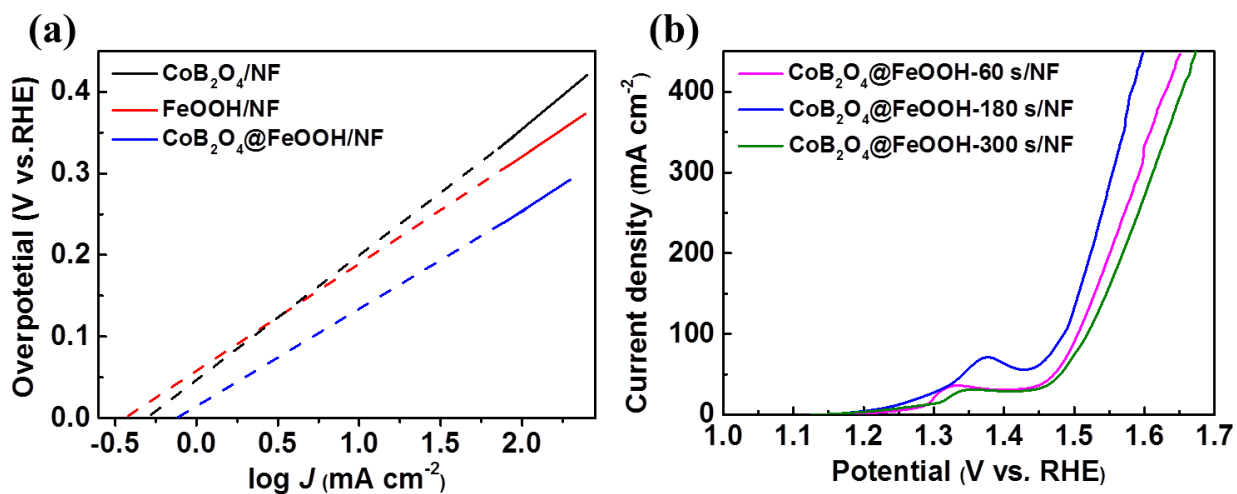

**Figure S8** (a) The exchange current density of  $\text{CoB}_2\text{O}_4/\text{NF}$ ,  $\text{FeOOH}/\text{NF}$  and  $\text{CoB}_2\text{O}_4@\text{FeOOH}/\text{NF}$ , (b) LSV curves of catalysts with different electro-synthesis time for  $\text{CoB}_2\text{O}_4@\text{FeOOH}/\text{NF}-60$ ,  $\text{CoB}_2\text{O}_4@\text{FeOOH}/\text{NF}-180$ ,  $\text{CoB}_2\text{O}_4@\text{FeOOH}/\text{NF}-300$ .

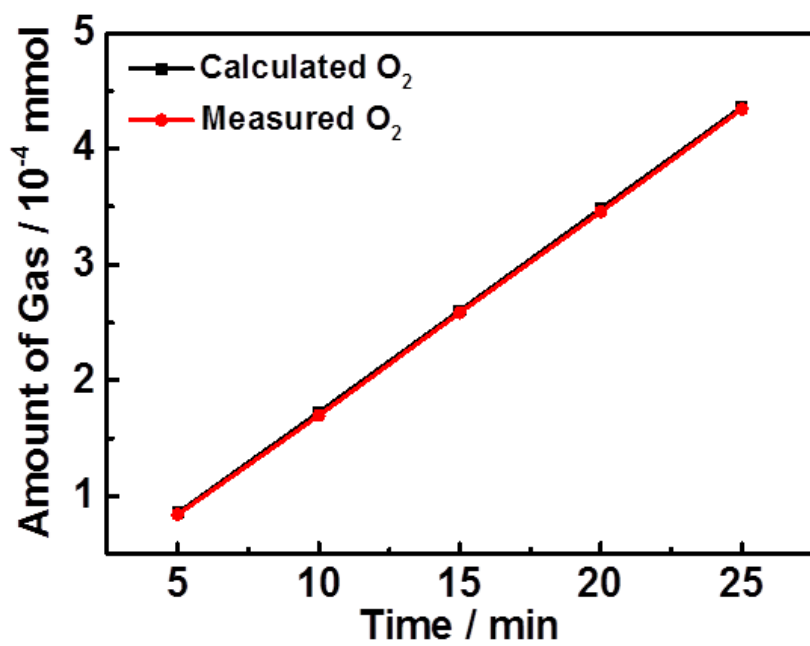

**Figure S9** Faradaic efficiency of the CoB<sub>2</sub>O<sub>4</sub>@FeOOH/NF catalyst for O<sub>2</sub> evolution.

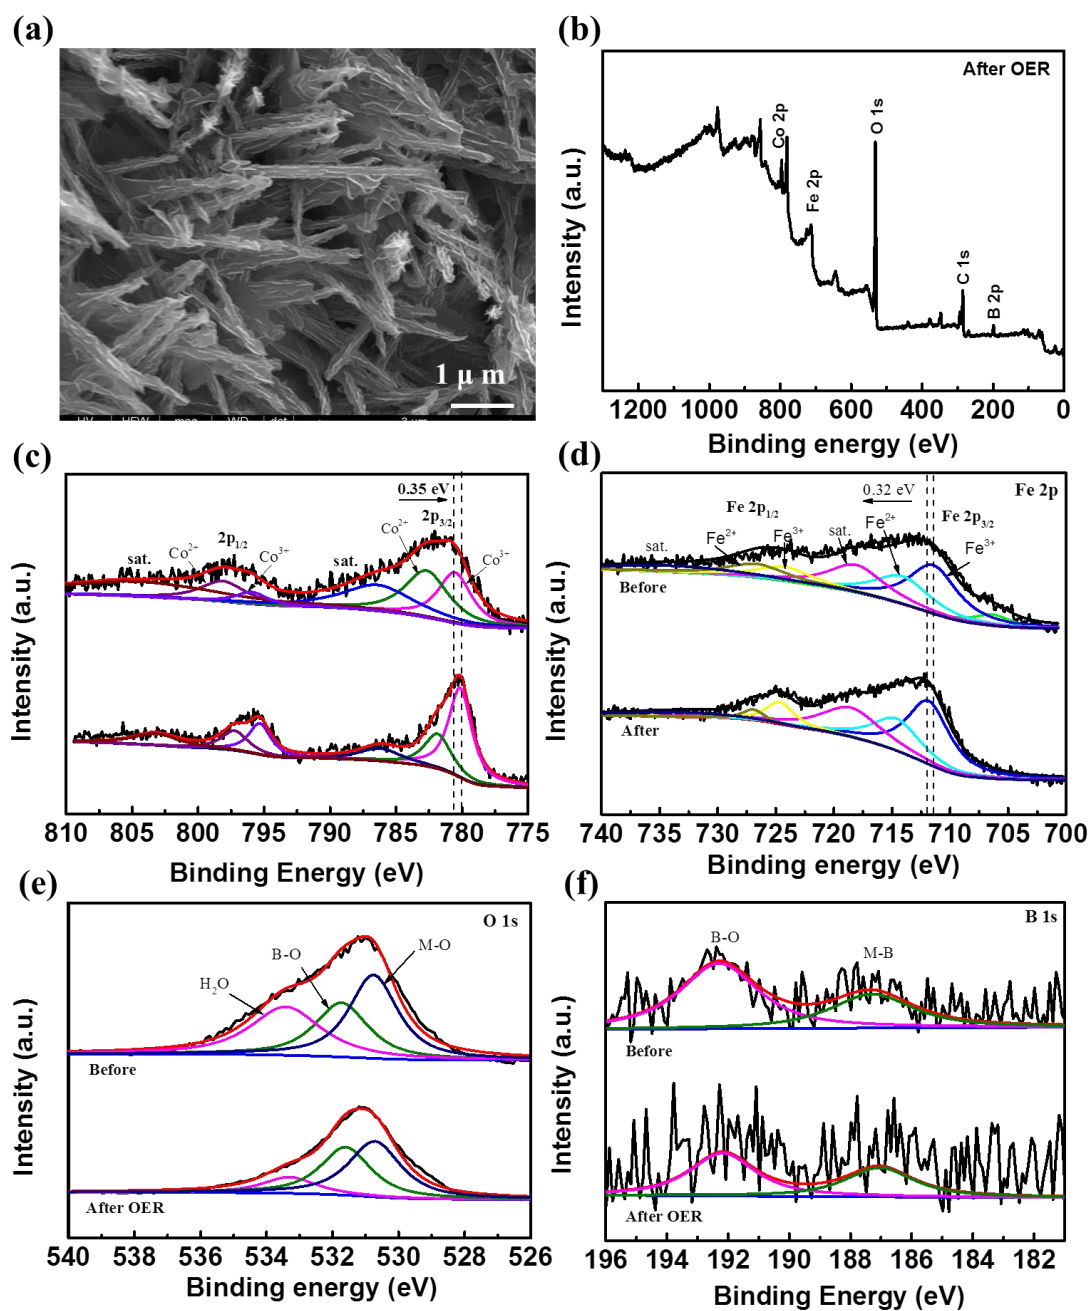

**Figure S10** (a) SEM image of  $\text{CoB}_2\text{O}_4@FeOOH/NF$  after durability test. (b) The survey XPS of  $\text{CoB}_2\text{O}_4@FeOOH/NF$  after durability test. Comparison of XPS spectra of (c) Co 2p, (d) Fe 2p, (e) O 1s and (f) B 1s before and after OER durability test.

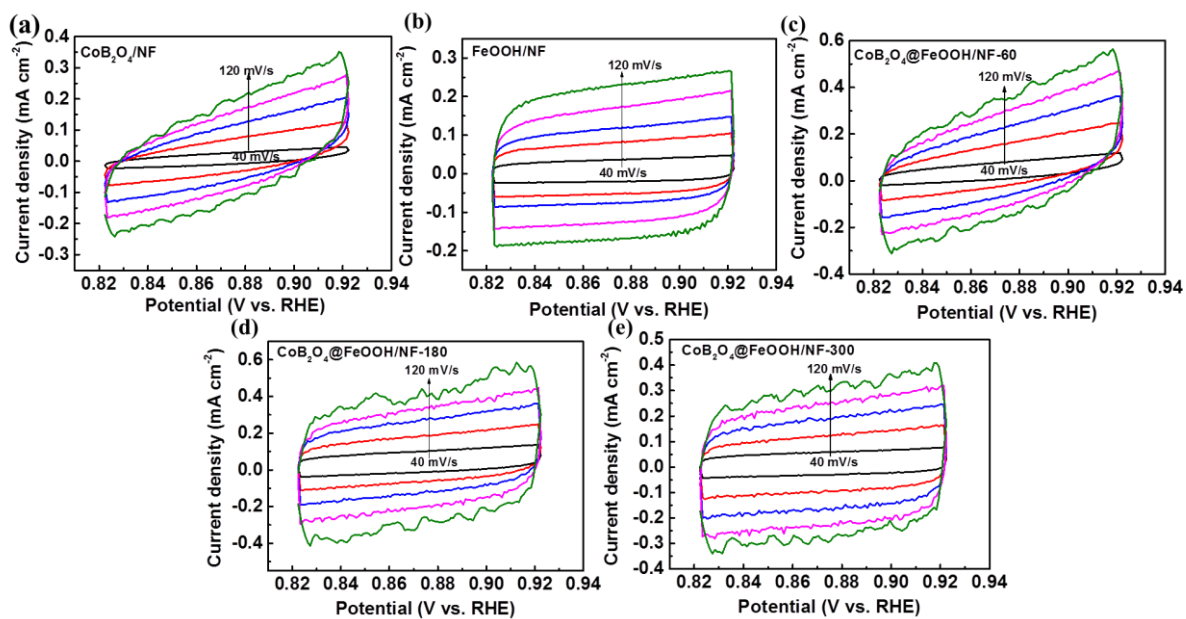

**Figure S11** CV curves of CoB<sub>2</sub>O<sub>4</sub> /NF, FeOOH/NF and CoB<sub>2</sub>O<sub>4</sub>@FeOOH/NF recorded from 0.8224 to 0.9224 V (vs. RHE) at different scan rates (40, 60, 80, 100, 120 mV s<sup>-1</sup>).

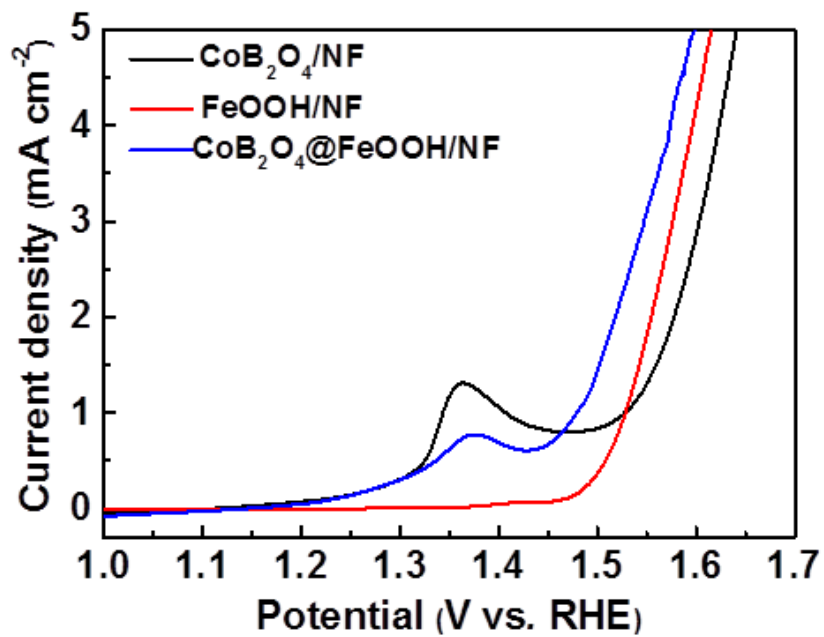

**Figure S12** OER polarization curves standardized by ECSA of CoB<sub>2</sub>O<sub>4</sub>/NF, FeOOH/NF and CoB<sub>2</sub>O<sub>4</sub>@FeOOH/NF.

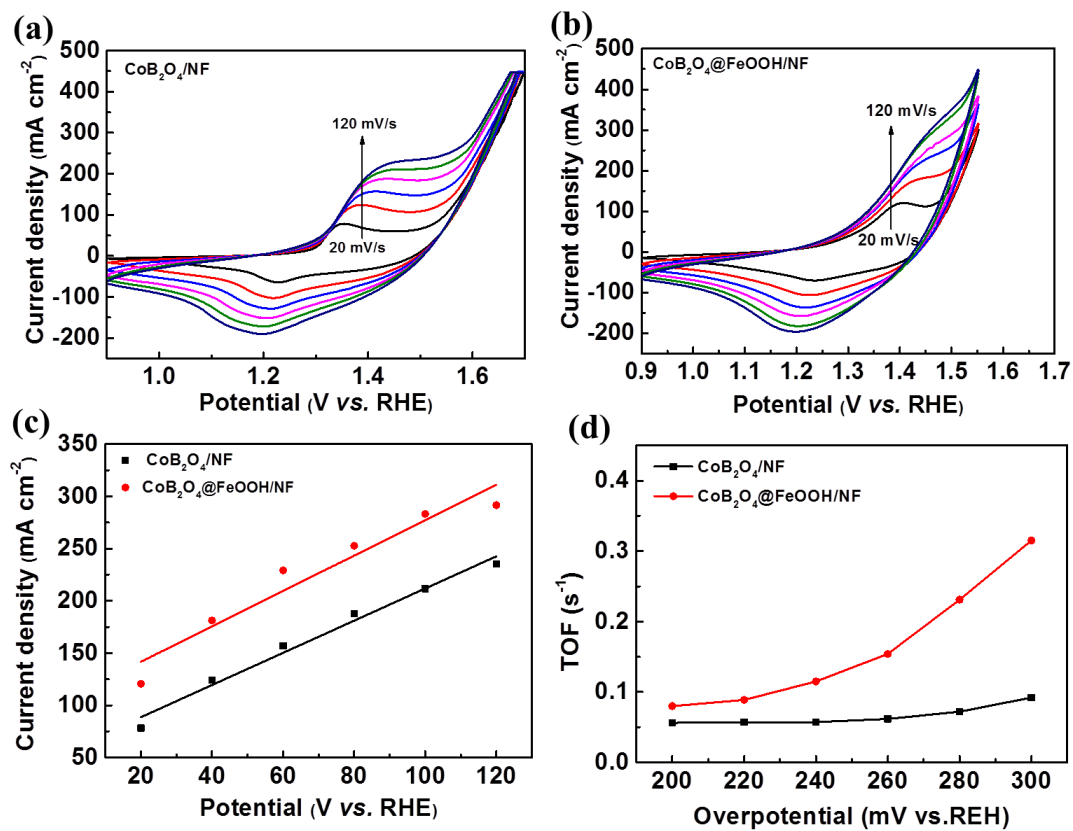

**Figure S13** Cyclic voltammograms of (a)  $\text{CoB}_2\text{O}_4/\text{NF}$  and (b)  $\text{CoB}_2\text{O}_4@\text{FeOOH}/\text{NF}$  at various scan rates (c) Linear relationship of the peak current density for oxidation wave as a function of scan rate for  $\text{CoB}_2\text{O}_4/\text{NF}$  and  $\text{CoB}_2\text{O}_4@\text{FeOOH}/\text{NF}$ . (d) Plot of TOF for  $\text{CoB}_2\text{O}_4/\text{NF}$  and  $\text{CoB}_2\text{O}_4@\text{FeOOH}/\text{NF}$

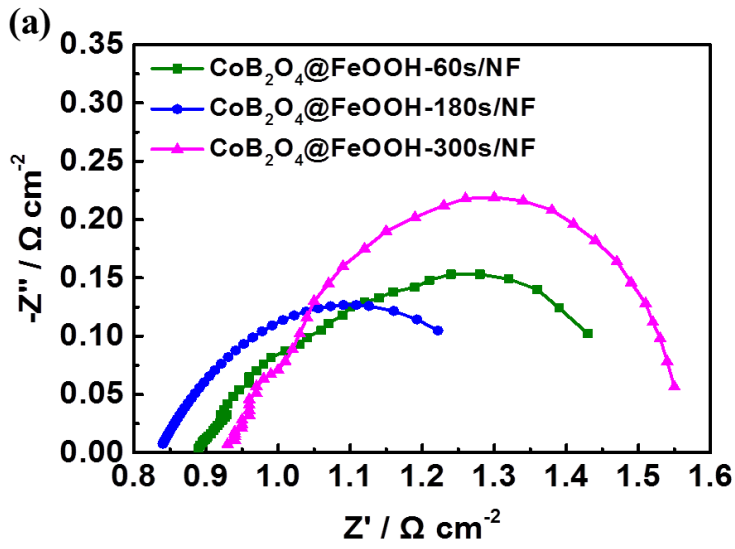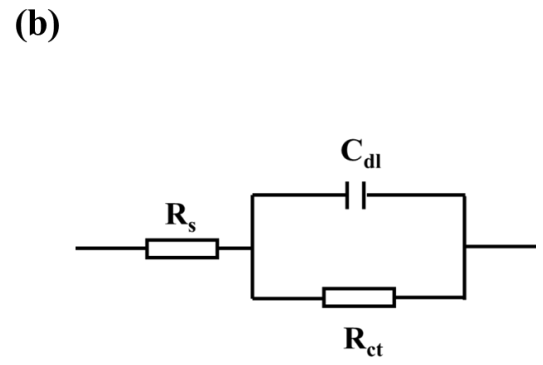

**Figure S14** (a) Nyquist plots of CoB<sub>2</sub>O<sub>4</sub>@FeOOH/NF with different deposition times (60, 180 and 300 s) at potential of 1.5 V (vs. RHE), (b) A simplified Randles circuit by fitting the plots.



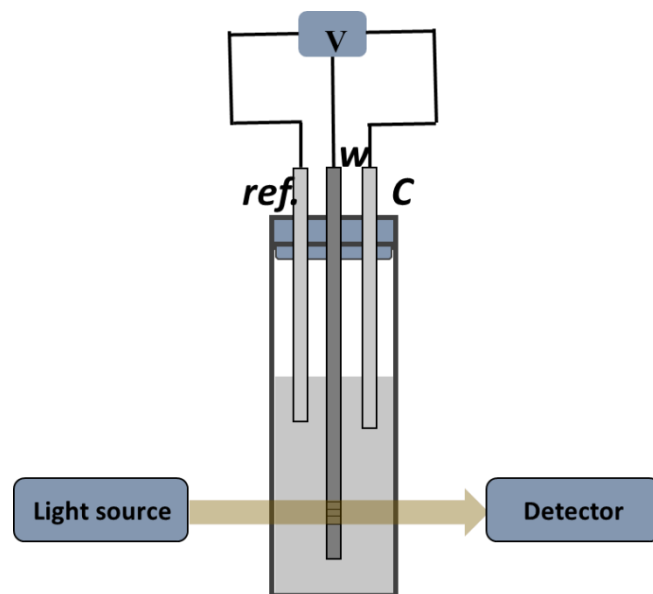

**Figure S15** In-situ UV-vis experiment. W is working electrode, ref. is reference electrode and c is counter electrode.

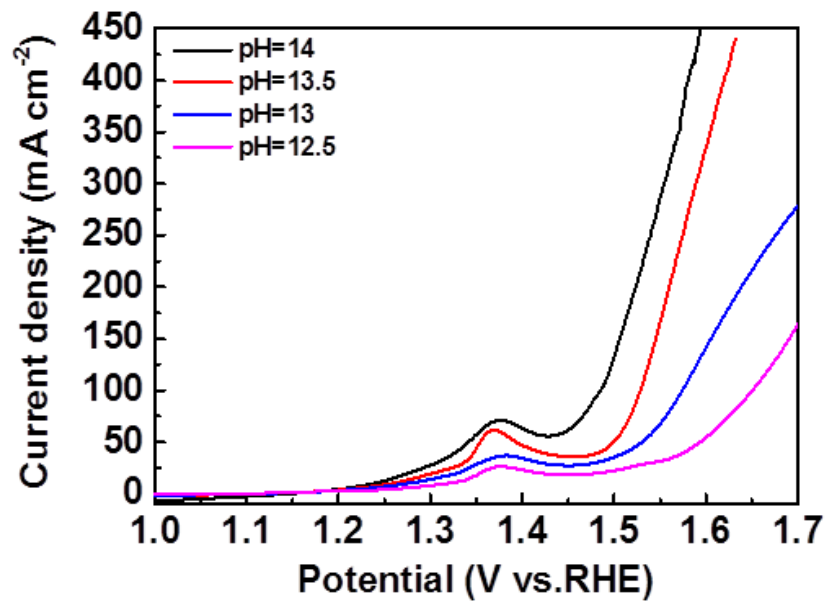

Fig. S16 LSV curves of CoB<sub>2</sub>O<sub>4</sub>@FeOOH/NF in a KOH solution with different PH range.

**Table S2** Comparison of reported electrocatalysts for overall water splitting

| Catalysts                                                                                                                              | Cell Voltages (V) |              | Stability (h)                   | Reference |
|----------------------------------------------------------------------------------------------------------------------------------------|-------------------|--------------|---------------------------------|-----------|
|                                                                                                                                        | $\eta_{50}$       | $\eta_{100}$ |                                 |           |
| CoB <sub>2</sub> O <sub>4</sub> @FeOOH/NF    Pt/C/NF                                                                                   | <b>1.537</b>      | <b>1.576</b> | 125@300 mA cm <sup>-2</sup>     | This work |
| NC/Ni <sub>3</sub> Mo <sub>3</sub> N/NF    NiMoO <sub>4</sub> ·xH <sub>2</sub> O/NF                                                    | 1.58              | 1.71         | 50 h@500 mA cm <sup>-2</sup>    | [11]      |
| NiFe(OH) <sub>x</sub> @Ni <sub>3</sub> S <sub>2</sub> /MoS <sub>2</sub> -CC   <br>Ni <sub>3</sub> S <sub>2</sub> /MoS <sub>2</sub> -CC | -                 | 1.71         | 48 h@20 mA cm <sup>-2</sup>     | [12]      |
| NiFeCo LDH    NiFeCo phosphide                                                                                                         | 1.44              | 1.58         | 70 h@50 mA cm <sup>-2</sup>     | [13]      |
| Co <sub>1-x</sub> Fe <sub>x</sub> -LDH    Ni <sub>1-x</sub> Fe <sub>x</sub> -LDH                                                       | 1.59              | 1.88         | 24 h@25 mA cm <sup>-2</sup>     | [14]      |
| FeOOH/Cr-NiCo <sub>2</sub> O <sub>4</sub> /NF   <br>FeOOH/Cr-NiCo <sub>2</sub> O <sub>4</sub> /NF                                      | 1.62              | 1.65         | 10 h@20 mA cm <sup>-2</sup>     | [1]       |
| Ni <sub>5</sub> P <sub>4</sub> /NiP <sub>2</sub> /NiFe LDH/NF   <br>Ni <sub>5</sub> P <sub>4</sub> /NiP <sub>2</sub> /NF               | 1.60              | 1.68         | 50 h@50 mA cm <sup>-2</sup>     | [15]      |
| NiFe LDH-NiSe/NF   <br>NiFe LDH-NiSe/NF                                                                                                | -                 | 1.84         | 75 h@12 mA cm <sup>-2</sup>     | [16]      |
| NiFe(OH) <sub>x</sub> /FeS/IF    MoNi <sub>4</sub> /MoO <sub>2</sub> /NF                                                               | -                 | 1.68         | 70 h@300 mA cm <sup>-2</sup>    | [17]      |
| Ni@NCNTs/NF-L    NiFe-L                                                                                                                | 1.52              | 2.1          | 10 h@100 mA cm <sup>-2</sup>    | [18]      |
| NiFe(OH) <sub>x</sub> /FeS/IF    MoNi <sub>4</sub> /MoO <sub>2</sub> /NF                                                               | 1.50              | 1.68         | 70 h@300 mA cm <sup>-2</sup>    | [19]      |
| NiFe LDH-MoS <sub>x</sub> /INF    20%PtC/INF                                                                                           | -                 | 1.72         | 20 h@100 mA cm <sup>-2</sup>    | [20]      |
| Co <sub>5</sub> Mo <sub>1.0</sub> O NSs@NF   <br>Co <sub>5</sub> Mo <sub>1.0</sub> O NSs@NF                                            | -                 | 1.90         | 30 h@10 mA cm <sup>-2</sup>     | [21]      |
| NiFe LDHs/NiCo <sub>2</sub> O <sub>4</sub> /NF   <br>NiFe LDHs/NiCo <sub>2</sub> O <sub>4</sub> /NF                                    | 1.81              | 1.95         | 24 h@15 mA cm <sup>-2</sup>     | [22]      |
| NiFe-HD/pre-NF    CoP/P-NiO/NF                                                                                                         | -                 | 1.62         | 85 h at 100 mA cm <sup>-2</sup> | [23]      |

## Reference

- 1 T. Liu, P. Diao, *Nano Res.*, 2020, **13**, 3299-3309.
- 2 S. Niu, W. J. Jiang, Z. X. Wei, T. Tang, J. M. Ma, J. S. Hu, L. J. Wan, *J. Am. Chem. Soc.*, 2019, **141**, 7005-7013
- 3 J. Cheng, B. Shen, Y. Song, J. Liu, Q. Ye, M. Mao, Y. Cheng, *Chem. Eng. J.*, 2022, **428**, 131130-131137
- 4 W. Bao, L. Xiao, J. Zhang, Z. Deng, C. Yang, T. Ai, X. Wei, *Chem. Commun.*, 2020, **56**, 9360-9363.
- 5 C. Xie, Y. Wang, D. Yan, L. Tao, S. Wang, *Nanoscale*, 2017, **9**, 16059-16065.
- 6 U. P. Suryawanshi, M. P. Suryawanshi, U. V. Ghorpade, S. W. Shin, J. Kim, J. H. Kim, *Appl. Surf. Sci.*, 2019, **495**, 143462-143469.
- 7 Y. Wang, Y. Ni, B. Liu, S. Shang, S. Yang, M. Cao, C. Hu, *Electrochim. Acta*, 2017, **257**, 356-363.
- 8 T. Tan, P. Han, H. Cong, G. Cheng, W. Luo, *ACS Sustain. Chem. Eng.*, 2019, **7**, 5620-5625.
- 9 X. Cao, Y. Sang, L. Wang, G. Ding, R. Yu, B. Geng, *Nanoscale*, 2020, **12**, 19404-19412.
- 10 J. X. Feng, H. Xu, Y. T. Dong, S. H. Ye, Y. X. Tong, G. R. Li, *Angew. Chem. Int. Ed.*, 2016, **55**, 3694-3698.
- 11 Y. Chen, J. Yu, J. Jia, F. Liu, Y. Zhang, G. Xiong, R. Zhang, R. Yang, D. Sun, H. Liu, W. Zhou, *Appl. Catal. B-Environ.*, 2020, **272**, 118956-118964.
- 12 X. H. Wang, Y. Ling, B. L. Li, X. L. Li, G. Chen, B. X. Tao, L. J. Li, N. B. Li, H. Q. Luo, *J. Mater. Chem. A*, 2019, **7**, 2895-2900.
- 13 J. Lee, H. Jung, Y. S. Park, N. Kwon, S. Woo, N. C. S. Selvam, G. S. Han, H. S. Jung, P. J. Yoo, S. M. Choi, J. W. Han, B. Lim, *Appl. Catal. B-Environ.*, 2021, **294**, 120246-120255.
- 14 G. Rajeshkhanna, T. I. Singh, N. H. Kim, J. H. Lee, *ACS Appl. Mater. Interfaces.*, 2018, **10**, 42453-42468.
- 15 L. Yu, H. Q. Zhou, J. Y. Sun, I. K. Mishra, D. Luo, F. Yu, Y. Yu, S. Chen, F. Ren, *J. Mater. Chem. A*, 2018, **6**, 13619-13623.
- 16 S. Dutta, A. Indra, F. Yi, T. Song, U. Paik, *ACS Appl. Mater. Interfaces*, 2017, **9**, 33766-33775.
- 17 M. Li, L. M. Tao, X. Xiao, X. W. Lv, X. X. Jiang, M. K. Wang, Z. Q. Peng, S. Yan, *ChemCatChem*, 2018, **10**, 4119-4125.
- 18 H. F. Yuan, F. Liu, G. B. Xue, H. Liu, Y. J. Wang, Y. W. Zhao, X. Y. Liu, X. L. Zhang, L. L. Zhao, Z. Liu, H. Liu, W. J. Zhou, *Appl. Catal. B- Environ.*, 2021, **283**, 119647-119657.
- 19 S. Niu, W. J. Jiang, T. Tang, L. P. Yuan, H. Luo, J. S. Hu, *Adv. Funct. Mater.*, 2019, **29**, 1902180-1902189
- 20 H. Zhang, G. Shen, X. Liu, B. Ning, C. Shi, L. Pan, X. Zhang, Z.-F. Huang, J.-J. Zou, *Chin. J. Catal.*, 2021, **42**, 1732-1741.
- 21 Y. Zhang, Q. Shao, S. Long, X. Huang, *Nano Energy*, 2018, **45**, 448-455.
- 22 Z. Wang, S. Zeng, W. Liu, X. Wang, Q. Li, Z. Zhao, F. Geng, *ACS Appl. Mater. Interfaces*, 2017,

**9**, 1488-1495.

23 B. Wu, Z. Yang, X. Dai, X. Yin, Y. Gan, F. Nie, Z. Ren, Y. Cao, Z. Li, X. Zhang, Dalton Trans., 2021, **50**, 12547-12554.
